# Supplementary material for: Depression and Complicated Grief, and Associated Factors, of Bereaved Family Members of Patients Who Died of Malignant Pleural Mesothelioma in Japan
Source: MDPI journal article supplement (doi:10.3390/jcm11123380), 2022-06-13
Supplement: s1 [file s1]

Supplementary Table S1. Bivariate analysis of PHQ-9 and BQG scores with clinical social factors.

|                                                               | p value    |                      |
|---------------------------------------------------------------|------------|----------------------|
|                                                               | Depression | Complicated<br>grief |
| Male patient *                                                | 0.715      | 0.401                |
| Patient's age at diagnosis **                                 | 0.515      | 0.912                |
| Survival **                                                   | 0.786      | 0.006                |
| Bereaved family member's age                                  | 0.506      | 0.106                |
| Female bereaved family member *                               | 0.951      | 0.297                |
| Spouse bereaved family member *                               | 0.209      | 0.133                |
| Time of bereavement **                                        | 0.893      | 0.157                |
| Financial impact of patient's MPM on family **                | 0.880      | 0.040                |
| Anger against asbestos **                                     | 0.001      | 0.001                |
| Compensated by workmen's accident compensation insurance *    | 0.590      | 0.573                |
| Compensated by asbestos-related health damage relief system * | 0.136      | 0.178                |
| Received surgery *                                            | 0.195      | 0.123                |
| Received chemotherapy *                                       | 0.956      | 0.384                |
| Received radiotherapy *                                       | 0.502      | 0.814                |
| Received palliative care *                                    | 0.987      | 0.403                |
| Experienced end-of-life discussion with patient*              | 0.678      | 0.902                |
| Satisfied with care on diagnosis *                            | 0.297      | 0.020                |
| Satisfied with care when the patient became critical *        | 0.297      | 0.013                |
| Patient died at home *                                        | 0.962      | 0.148                |
| Patient died sooner than expected *                           | 0.426      | 0.728                |
| GDI Score**                                                   | 0.272      | 0.000                |
| CES Score**                                                   | 0.991      | 0.089                |
| * t-test                                                      |            |                      |
| **Correlation analysis                                        |            |                      |
